# Supplementary material
Source: PubMed Central journal article supplement (PMC7995139)

Supplementary Figure 1: Representative ROC plots for all 20 skin conditions showing the AUC values from fold 0

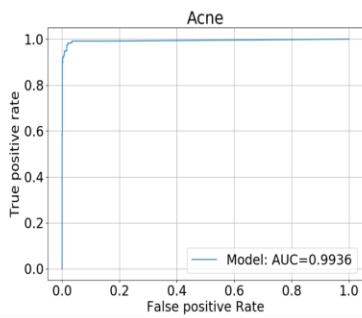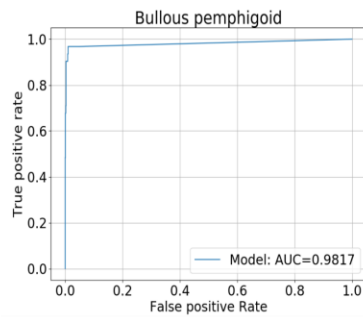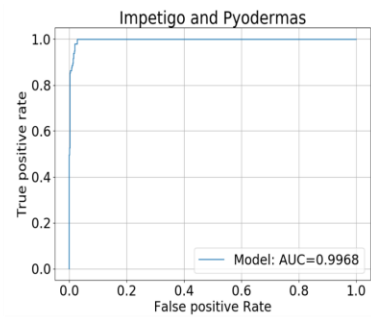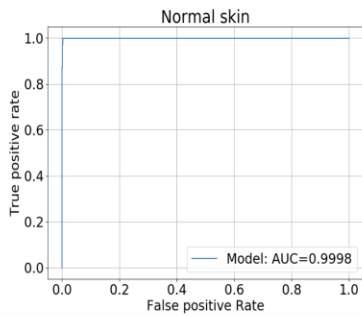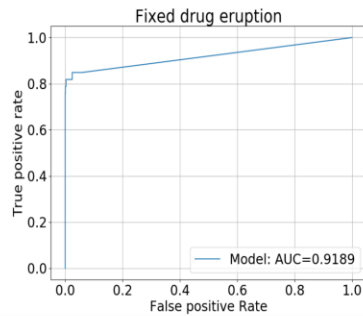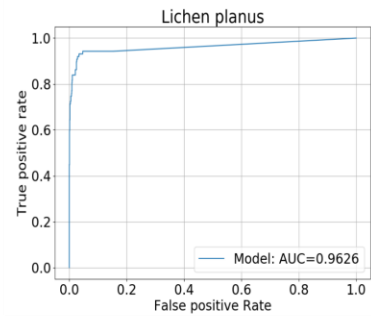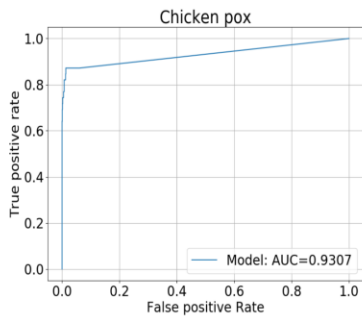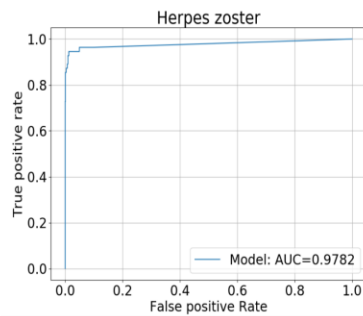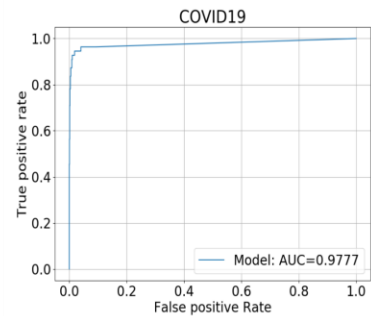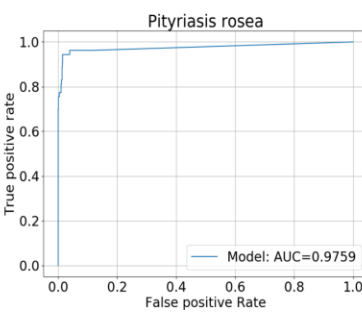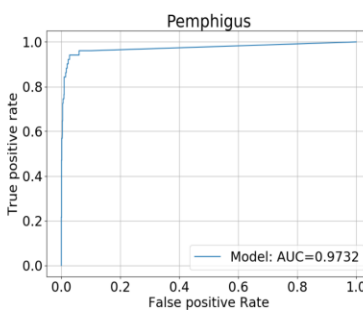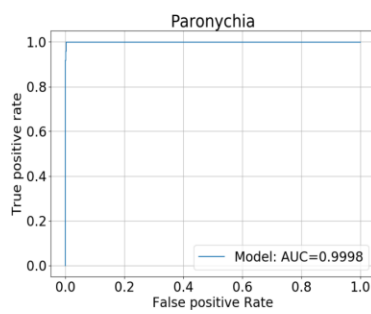

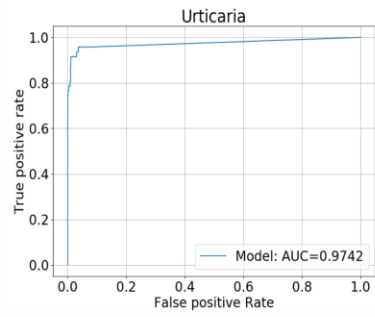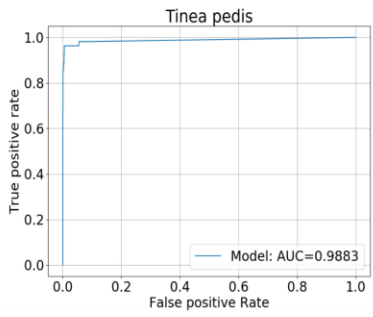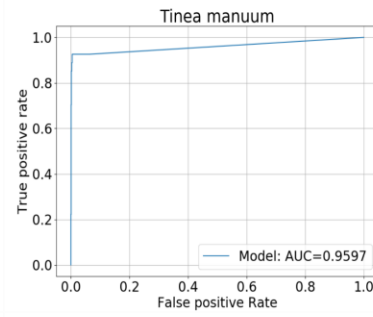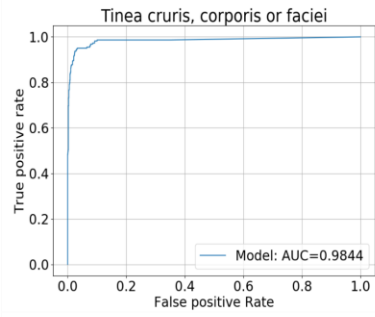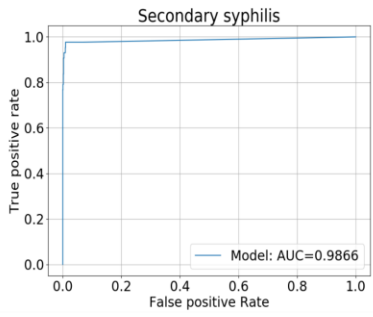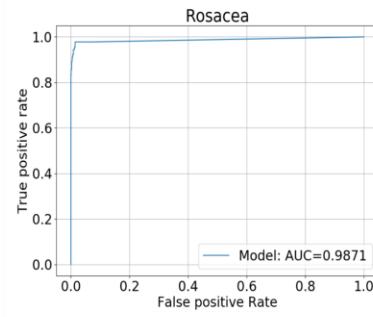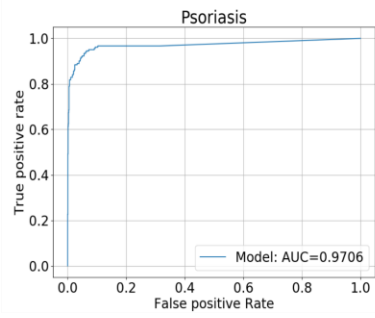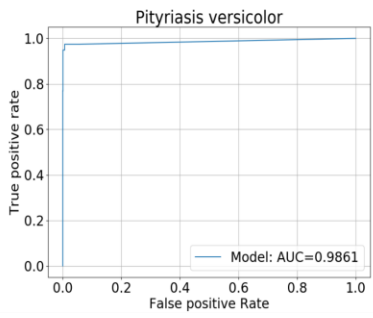

Supplement: DTH-34-0-s001.pdf [file DTH-34-0-s001.pdf]
